# Supplementary material
Source: Springer Nature journal article supplement (https://www.springermedizin.de/resource/supplementary/13550_2013_128_MOESM2_ESM.pdf/9687650)

A) Gd(+), T2/Flair (+) , PET(+)

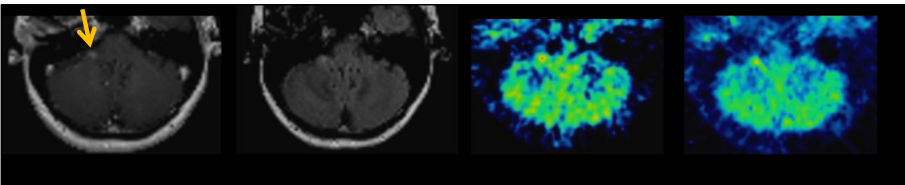

B) Gd(+), T2/Flair (+) , PET(-)

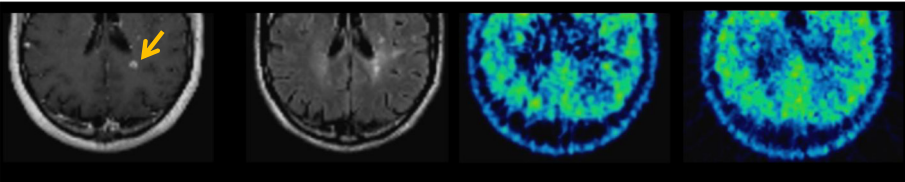

C) Gd(-), T2/Flair (+) , PET(-)

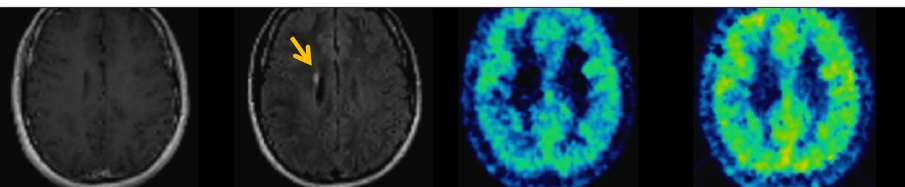

T1Gd

FLAIR

SUV

Logan VT

Supplement: MOESM2 [file 9687650]
